# Supplementary material for: Understanding the mechanism of red light-induced melatonin biosynthesis facilitates the engineering of melatonin-enriched tomatoes
Source: Research Square preprint supplement (doi:10.21203/rs.3.rs-2441534/v1), 2023-07-19
Supplement: Supplementary file 1 [file dc27b1366272093d54dbccfb.xlsx]

## Sheet: proSlCOMT2
Subject id	% identity	alignment length	mismatches	gap openings	q. start	q. end	s. start	s. end	e-value	bit score	NR_Description
Solyc03g034180.3.1	100	150	0	0	1	150	626	775	4e-74	278	14-3-3-like protein
Solyc10g079080.2.1	100	150	0	0	1	150	157	306	4e-74	278	stress-associated protein 5
Solyc02g083800.3.1	100	150	0	0	1	150	188	39	4e-74	278	cold shock domain-containing protein 3-like
Solyc04g054990.3.1	100	150	0	0	1	150	1682	1533	4e-74	278	PLAT domain-containing protein 2-like
Solyc01g090290.3.1	100	150	0	0	1	150	9416	9267	4e-74	278	COP9 signalosome complex subunit 7 isoform X3
Solyc03g034180.3.1	100	150	0	0	1	150	747	896	4e-74	278	14-3-3-like protein
Solyc03g082420.3.1	100	150	0	0	1	150	230	379	4e-74	278	small heat shock protein, chloroplastic
Solyc01g009070.3.1	100	150	0	0	1	150	272	421	4e-74	278	GAMyb-like1
Solyc07g063410.3.1	100	150	0	0	1	150	1124	1273	4e-74	278	JA2-like
Solyc09g009260.3.1	100	150	0	0	1	150	1283	1432	4e-74	278	fructose-1,6-bisphosphate aldolase
Solyc06g059740.3.1	100	150	0	0	1	150	2099	1950	4e-74	278	alcohol dehydrogenase 2
Solyc06g060680.2.1	100	150	0	0	1	150	87	236	4e-74	278	non-functional pseudokinase ZED1-like
Solyc01g087240.3.1	100	150	0	0	1	150	6121	6270	4e-74	278	nuclear transcription factor Y subunit A-9 isoform X2
Solyc03g082420.3.1	100	150	0	0	1	150	101	250	4e-74	278	small heat shock protein, chloroplastic
Solyc10g079080.2.1	100	150	0	0	1	150	114	263	4e-74	278	stress-associated protein 5
Solyc06g006080.3.1	100	150	0	0	1	150	4798	4947	4e-74	278	thiamine biosynthesis protein ThiC
Solyc09g009260.3.1	100	150	0	0	1	150	1103	1252	4e-74	278	fructose-1,6-bisphosphate aldolase
Solyc03g118890.3.1	100	150	0	0	1	150	4988	5137	4e-74	278	protein phosphatase 2C family protein
Solyc03g034180.3.1	100	150	0	0	1	150	799	948	4e-74	278	14-3-3-like protein
Solyc10g079080.2.1	100	150	0	0	1	150	318	169	4e-74	278	stress-associated protein 5
Solyc06g059740.3.1	100	150	0	0	1	150	2222	2073	4e-74	278	alcohol dehydrogenase 2
Solyc07g049140.3.1	100	150	0	0	1	150	35	184	4e-74	278	fruit-specific protein
Solyc11g012790.2.1	100	150	0	0	1	150	31583	31434	4e-74	278	WEB family protein At5g55860-like
Solyc02g080220.3.1	100	150	0	0	1	150	854	705	4e-74	278	pectinesterase-like
Solyc02g080200.3.1	100	150	0	0	1	150	9845	9994	4e-74	278	pectinesterase-like
Solyc02g080190.3.1	100	150	0	0	1	150	2042	2191	4e-74	278	pectinesterase-like
Solyc06g059740.3.1	100	150	0	0	1	150	2034	1885	4e-74	278	alcohol dehydrogenase 2
Solyc04g008700.3.1	100	150	0	0	1	150	23213	23362	4e-74	278	pre-mRNA-processing protein 40C isoform X1
Solyc03g095770.3.1	100	150	0	0	1	150	2107	2256	4e-74	278	probable WRKY transcription factor 70
Solyc09g097870.3.1	100	150	0	0	1	150	1092	1241	4e-74	278	transcription factor bHLH62
Solyc06g006080.3.1	100	150	0	0	1	150	4954	4805	4e-74	278	thiamine biosynthesis protein ThiC
Solyc03g034200.3.1	100	150	0	0	1	150	222	73	4e-74	278	KH domain-containing protein At4g18375
Solyc03g005770.2.1	100	150	0	0	1	150	338	487	4e-74	278	chlorophyll a-b binding protein 3C, chloroplastic
Solyc03g005760.1.1	100	150	0	0	1	150	467	318	4e-74	278	chlorophyll a-b binding protein 3A, chloroplastic-like
Solyc04g007060.3.1	100	150	0	0	1	150	2138	2287	4e-74	278	putative late blight resistance protein homolog R1A-3
Solyc10g079080.2.1	100	150	0	0	1	150	91	240	4e-74	278	stress-associated protein 5
Solyc10g079080.2.1	100	150	0	0	1	150	91	240	4e-74	278	stress-associated protein 5
Solyc03g034180.3.1	100	150	0	0	1	150	783	634	4e-74	278	14-3-3-like protein
Solyc10g006900.3.1	100	150	0	0	1	150	3567	3716	4e-74	278	light dependent NADH:protochlorophyllide oxidoreductase 3
Solyc07g063410.3.1	100	150	0	0	1	150	1189	1040	4e-74	278	JA2-like
Solyc05g054800.2.1	100	150	0	0	1	150	1027	878	4e-74	278	ALA-interacting subunit 1-like
Solyc07g064190.2.1	100	150	0	0	1	150	1820	1671	4e-74	278	pectin esterase
Solyc03g121070.3.1	100	150	0	0	1	150	2796	2647	4e-74	278	IAA26
Solyc01g009070.3.1	100	150	0	0	1	150	517	368	4e-74	278	GAMyb-like1
Solyc10g007310.1.1	100	150	0	0	1	150	541	392	4e-74	278	protein LIGHT-DEPENDENT SHORT HYPOCOTYLS 10-like
Solyc01g111920.3.1	100	150	0	0	1	150	3421	3570	4e-74	278	F-box protein SKIP23-like
Solyc10g079080.2.1	100	150	0	0	1	150	35	184	4e-74	278	stress-associated protein 5
Solyc04g081170.3.1	100	150	0	0	1	150	558	409	4e-74	278	GAGA-binding transcriptional activator isoform X1
Solyc09g018280.1.1	100	150	0	0	1	150	1183	1034	4e-74	278	CBL-interacting serine..threonine-protein kinase 14
Solyc01g102300.3.1	100	150	0	0	1	150	4615	4466	4e-74	278	transcription factor PIF3
Solyc12g063050.2.1	100	150	0	0	1	150	5605	5754	4e-74	278	putative transcription regulator CPL1
Solyc01g108560.3.1	100	150	0	0	1	150	16183	16332	4e-74	278	carboxylesterase 1
Solyc11g008000.2.1	100	150	0	0	1	150	6093	5944	4e-74	278	NAC domain-containing protein 53
Solyc03g114600.3.1	100	150	0	0	1	150	2514	2365	4e-74	278	protein ASC1 isoform X1
Solyc01g009170.3.1	100	150	0	0	1	150	256	107	4e-74	278	EIL2
Solyc03g095770.3.1	100	150	0	0	1	150	2319	2468	4e-74	278	probable WRKY transcription factor 70
Solyc09g092040.3.1	100	150	0	0	1	150	1792	1941	4e-74	278	UBX domain-containing protein
Solyc02g083860.3.1	100	150	0	0	1	150	55	204	4e-74	278	flavanone 3-dioxygenase
Solyc05g007770.3.1	100	150	0	0	1	150	1884	2033	4e-74	278	NAC transcription factor family protein
Solyc04g016230.3.1	100	150	0	0	1	150	310	161	4e-74	278	zeatin O-xylosyltransferase-like
Solyc12g013800.2.1	100	150	0	0	1	150	111	260	4e-74	278	E3 ubiquitin-protein ligase RMA3-like isoform X1
Solyc09g098100.3.1	100	150	0	0	1	150	7536	7685	4e-74	278	putative late blight resistance protein homolog R1A-3
Solyc01g108560.3.1	100	150	0	0	1	150	16324	16175	4e-74	278	carboxylesterase 1
Solyc01g008270.3.1	100	150	0	0	1	150	3666	3815	4e-74	278	probable prefoldin subunit 5
Solyc10g078300.2.1	100	150	0	0	1	150	2081	1932	4e-74	278	R3H domain-containing protein 2
Solyc04g071610.3.1	100	150	0	0	1	150	1284	1135	4e-74	278	ASR1 protein [Solanum chilense]
Solyc10g006900.3.1	100	150	0	0	1	150	2603	2454	4e-74	278	light dependent NADH:protochlorophyllide oxidoreductase 3
Solyc05g007770.3.1	100	150	0	0	1	150	2013	1864	4e-74	278	NAC transcription factor family protein
Solyc03g119670.3.1	100	150	0	0	1	150	10494	10643	4e-74	278	protein ASPARTIC PROTEASE IN GUARD CELL 1
Solyc05g007110.2.1	100	150	0	0	1	150	3338	3487	4e-74	278	probable WRKY transcription factor 72
Solyc03g117600.3.1	100	150	0	0	1	150	8918	8769	4e-74	278	heat shock 70 kDa protein 5
Solyc02g084520.3.1	100	150	0	0	1	150	10117	9968	4e-74	278	zinc finger CCCH domain-containing protein 44-like
Solyc11g069340.2.1	100	150	0	0	1	150	586	735	4e-74	278	zinc finger CCCH domain-containing protein 24
Solyc03g114760.3.1	100	150	0	0	1	150	4289	4438	4e-74	278	Hop-interacting protein THI110
Solyc01g100200.3.1	100	150	0	0	1	150	10	159	4e-74	278	GRAS4 isoform 1
Solyc01g100190.3.1	100	150	0	0	1	150	11063	11212	4e-74	278	GRAS4
Solyc06g007460.3.1	100	150	0	0	1	150	205	56	4e-74	278	EPIDERMAL PATTERNING FACTOR-like protein 6
Solyc02g005210.3.1	100	150	0	0	1	150	278	129	4e-74	278	protein COFACTOR ASSEMBLY OF COMPLEX C SUBUNIT B CCB1, chloroplastic
Solyc10g006890.3.1	100	150	0	0	1	150	10240	10091	4e-74	278	WD repeat-containing protein 44-like
Solyc03g034200.3.1	100	150	0	0	1	150	247	98	4e-74	278	KH domain-containing protein At4g18375
Solyc05g007770.3.1	100	150	0	0	1	150	2019	1870	4e-74	278	NAC transcription factor family protein
Solyc02g070935.1.1	100	150	0	0	1	150	2731	2582	4e-74	278	chlorophyll a-b binding protein 1B, chloroplastic
Solyc05g007770.3.1	100	150	0	0	1	150	2019	1870	4e-74	278	NAC transcription factor family protein
Solyc03g093200.3.1	100	150	0	0	1	150	6061	5912	4e-74	278	cell number regulator 6
Solyc01g096680.3.1	100	150	0	0	1	150	718	569	4e-74	278	cytochrome P450 98A2-like
Solyc01g096670.3.1	100	150	0	0	1	150	2907	2758	4e-74	278	cytochrome P450 98A2-like
Solyc02g080190.3.1	100	150	0	0	1	150	2005	2154	4e-74	278	pectinesterase-like
Solyc05g007770.3.1	100	150	0	0	1	150	2019	1870	4e-74	278	NAC transcription factor family protein
Solyc03g113290.2.1	100	150	0	0	1	150	151	2	4e-74	278	short-chain dehydrogenase reductase 3b-like
Solyc03g119130.3.1	100	150	0	0	1	150	4551	4402	4e-74	278	basic salivary proline-rich protein 1
Solyc10g075150.2.1	100	150	0	0	1	150	156	305	4e-74	278	non-specific lipid-transfer protein 2-like
Solyc03g114150.3.1	100	150	0	0	1	150	4535	4386	4e-74	278	aldehyde dehydrogenase family 2 member B7a
Solyc01g079090.3.1	100	150	0	0	1	150	4972	4823	4e-74	278	protoporphyrinogen oxidase
Solyc08g079830.3.1	100	150	0	0	1	150	590	739	4e-74	278	copper chaperone for superoxide dismutase isoform 1
Solyc08g079820.3.1	100	150	0	0	1	150	3760	3909	4e-74	278	copper chaperone for superoxide dismutase isoform 2
Solyc03g114150.3.1	100	150	0	0	1	150	4382	4531	4e-74	278	aldehyde dehydrogenase family 2 member B7a
Solyc10g078300.2.1	100	150	0	0	1	150	2065	1916	4e-74	278	R3H domain-containing protein 2
Solyc09g089580.3.1	100	150	0	0	1	150	1777	1628	4e-74	278	E8 protein
Solyc05g007770.3.1	100	150	0	0	1	150	2015	1866	4e-74	278	NAC transcription factor family protein
Solyc05g008860.3.1	100	150	0	0	1	150	573	424	4e-74	278	receptor protein kinase-like protein ZAR1
Solyc04g008340.2.1	100	150	0	0	1	150	243	392	4e-74	278	IAA-alanine resistance protein 1 isoform X1
Solyc10g076790.2.1	100	150	0	0	1	150	1174	1323	4e-74	278	LAX4 protein
Solyc03g119650.3.1	100	150	0	0	1	150	19282	19431	4e-74	278	DENN domain and WD repeat-containing protein SCD1 isoform X1
Solyc02g070530.3.1	100	150	0	0	1	150	578	429	4e-74	278	potassium channel KAT1
Solyc09g076050.3.1	100	150	0	0	1	150	2994	3143	4e-74	278	FRIGIDA-like protein 4a
Solyc04g081170.3.1	100	150	0	0	1	150	559	708	4e-74	278	GAGA-binding transcriptional activator isoform X1
Solyc04g082060.3.1	100	150	0	0	1	150	2828	2977	4e-74	278	F-box protein SKIP23-like
Solyc09g091510.3.1	100	150	0	0	1	150	1807	1956	4e-74	278	chalcone synthase 1
Solyc09g091510.3.1	100	150	0	0	1	150	1807	1956	4e-74	278	chalcone synthase 1
Solyc11g013110.2.1	100	150	0	0	1	150	4447	4298	4e-74	278	flavonol synthase..flavanone 3-hydroxylase
Solyc02g090820.3.1	100	150	0	0	1	150	191	340	4e-74	278	heat shock factor protein HSF24
Solyc02g090820.3.1	100	150	0	0	1	150	191	340	4e-74	278	heat shock factor protein HSF24
Solyc03g121295.1.1	100	150	0	0	1	150	1063	1212	4e-74	278	jacalin-related lectin 19
Solyc12g088740.2.1	100	150	0	0	1	150	5731	5582	4e-74	278	probable E3 ubiquitin-protein ligase RHG1A
Solyc02g021560.3.1	100	150	0	0	1	150	17512	17661	4e-74	278	UBP1-associated protein 2C
Solyc01g095200.3.1	100	150	0	0	1	150	2614	2763	4e-74	278	reticulon-like protein B1
Solyc10g083630.2.1	100	150	0	0	1	150	8761	8612	4e-74	278	protein ROS1 isoform X2
Solyc02g005210.3.1	100	150	0	0	1	150	127	276	4e-74	278	protein COFACTOR ASSEMBLY OF COMPLEX C SUBUNIT B CCB1, chloroplastic
Solyc05g053650.3.1	100	150	0	0	1	150	7323	7472	4e-74	278	26S proteasome non-ATPase regulatory subunit 1 homolog A
Solyc06g070970.3.1	100	150	0	0	1	150	4021	4170	4e-74	278	WRKY72b
Solyc12g014210.2.1	100	150	0	0	1	150	7380	7231	4e-74	278	UBP1-associated protein 2C-like
Solyc08g066860.2.1	100	150	0	0	1	150	16	165	4e-74	278	VAN3-binding protein
Solyc12g096350.2.1	100	150	0	0	1	150	1364	1513	4e-74	278	probable WRKY transcription factor 17
Solyc02g091960.3.1	100	150	0	0	1	150	2725	2576	4e-74	278	protein CROWDED NUCLEI 4
Solyc05g007110.2.1	100	150	0	0	1	150	3410	3261	4e-74	278	probable WRKY transcription factor 72
Solyc09g076050.3.1	100	150	0	0	1	150	3606	3457	4e-74	278	FRIGIDA-like protein 4a
Solyc05g054200.3.1	100	150	0	0	1	150	355	504	4e-74	278	WRKY transcription factor IId-1
Solyc11g071320.2.1	100	150	0	0	1	150	228	79	4e-74	278	WRKY transcription factor
Solyc12g096350.2.1	100	150	0	0	1	150	1364	1513	4e-74	278	probable WRKY transcription factor 17
Solyc04g072060.3.1	100	150	0	0	1	150	1625	1774	4e-74	278	probable WRKY transcription factor 51
Solyc07g066220.3.1	100	150	0	0	1	150	359	508	4e-74	278	WRKY transcription factor 2
Solyc07g066220.3.1	100	150	0	0	1	150	9808	9957	4e-74	278	WRKY transcription factor 2
Solyc10g007970.2.1	100	150	0	0	1	150	4644	4793	4e-74	278	probable WRKY transcription factor 65
Solyc06g071690.3.1	100	150	0	0	1	150	1626	1775	4e-74	278	transcription factor MYB86-like
Solyc01g111500.3.1	100	150	0	0	1	150	486	635	4e-74	278	myb-related protein 308-like
Solyc02g092920.3.1	100	150	0	0	1	150	9083	8934	4e-74	278	transcription factor MYB44-like
Solyc06g065100.3.1	100	150	0	0	1	150	1903	2052	4e-74	278	myb-related protein 330
Solyc10g079070.2.1	100	150	0	0	1	150	5453	5304	4e-74	278	transcription factor bHLH48
Solyc01g111130.3.1	100	150	0	0	1	150	2552	2701	4e-74	278	transcription factor bHLH121 isoform X1
Solyc01g010135.1.1	100	150	0	0	1	150	654	803	4e-74	278	transcription factor bHLH49-like
Solyc12g015880.2.1	100	150	0	0	1	150	9771	9920	4e-74	278	molecular chaperone Hsp90-1
Solyc07g053830.3.1	100	150	0	0	1	150	4267	4118	4e-74	278	PIF4,bHLH transcription factor 052
Solyc05g055750.3.1	100	149	0	0	2	150	909	1057	1e-73	276	probable WRKY transcription factor 26
Solyc09g097870.3.1	100	148	0	0	1	148	968	821	5e-73	274	transcription factor bHLH62
Solyc09g015770.3.1	99.33	150	1	0	1	150	108	257	2e-72	272	WRKY3
Solyc11g073120.2.1	99.33	150	1	0	1	150	1243	1094	2e-72	272	transcription factor MYB48
Solyc07g020960.3.1	99.33	150	1	0	1	150	182	33	2e-72	272	transcription factor bHLH68
Solyc03g113620.3.1	99.33	149	1	0	2	150	756	904	6e-72	270	transcription factor MYB1R1
Solyc01g010135.1.1	99.33	149	0	1	2	150	635	782	2e-71	268	transcription factor bHLH49-like
Solyc05g014030.3.1	99.33	149	0	1	3	150	970	822	2e-71	268	ultraviolet-B receptor UVR8
Solyc06g065100.3.1	98.67	150	2	0	1	150	1669	1818	8e-71	267	myb-related protein 330
Solyc07g008010.3.1	100	142	0	0	9	150	1349	1490	1e-69	263	transcription factor MYB82
Solyc06g069850.3.1	99.3	142	1	0	9	150	1373	1514	5e-68	257	myb-related protein 306-like
Solyc08g074290.3.1	99.3	142	1	0	9	150	9753	9612	5e-68	257	NAC domain-containing protein 79
Solyc08g079170.3.1	100	139	0	0	7	145	5056	5194	5e-68	257	hsp70-Hsp90 organizing protein 2
Solyc07g063830.3.1	97.37	152	1	1	2	150	3799	3950	2e-67	255	transcription factor bHLH123
Solyc02g084880.3.1	100	58	0	0	93	150	5333	5390	5e-23	108	transcription factor bHLH110-like
Solyc08g014120.3.1	100	54	0	0	1	54	54	1	8e-21	100	transcription factor bHLH113 isoform X1
Solyc03g116340.3.1	100	54	0	0	7	60	3219	3166	8e-21	100	transcription factor bHLH47
Solyc01g079260.3.1	100	53	0	0	98	150	2281	2333	3e-20	99	probable WRKY transcription factor 23
Solyc07g065260.3.1	100	53	0	0	1	53	5294	5346	3e-20	99	probable WRKY transcription factor 20
Solyc01g086870.3.1	100	53	0	0	98	150	130	78	3e-20	99	transcription factor bHLH130-like
Solyc10g081170.2.1	93.94	66	3	1	37	102	2288	2352	3e-20	99	WD repeat-containing protein 44-like
Solyc09g065160.3.1	93.94	66	3	1	1	66	6610	6674	3e-20	99	NAC domain-containing protein 30
Solyc11g066120.2.1	94.03	67	0	3	87	150	2076	2141	3e-20	99	inner membrane protein PPF-1, chloroplastic isoform X1
Solyc01g095330.2.1	95.16	62	3	0	66	127	120	59	3e-20	99	BAG family molecular chaperone regulator 6

## Sheet: proSlASMT5
Subject id	% identity	alignment length	mismatches	gap openings	q. start	q. end	s. start	s. end	e-value	bit score	NR_Description
Solyc12g014210.2.1	100	150	0	0	1	150	8961	8812	4e-74	278	UBP1-associated protein 2C-like
Solyc04g026020.3.1	100	150	0	0	1	150	93	242	4e-74	278	protein SIEVE ELEMENT OCCLUSION B-like
Solyc03g093200.3.1	100	150	0	0	1	150	6190	6041	4e-74	278	cell number regulator 6
Solyc03g119690.2.1	100	150	0	0	1	150	175	26	4e-74	278	protein ASPARTIC PROTEASE IN GUARD CELL 1
Solyc03g114600.3.1	100	150	0	0	1	150	2364	2513	4e-74	278	protein ASC1 isoform X1
Solyc09g091510.3.1	100	150	0	0	1	150	1937	1788	4e-74	278	chalcone synthase 1
Solyc01g100200.3.1	100	150	0	0	1	150	153	4	4e-74	278	GRAS4 isoform 1
Solyc01g100190.3.1	100	150	0	0	1	150	11206	11057	4e-74	278	GRAS4
Solyc02g081170.3.1	100	150	0	0	1	150	359	210	4e-74	278	plastid lipid associated protein CHRC
Solyc02g066940.3.1	100	150	0	0	1	150	1920	2069	4e-74	278	protein RIK isoform X2
Solyc09g009260.3.1	100	150	0	0	1	150	1341	1490	4e-74	278	fructose-1,6-bisphosphate aldolase
Solyc10g079080.2.1	100	150	0	0	1	150	53	202	4e-74	278	stress-associated protein 5
Solyc03g034200.3.1	100	150	0	0	1	150	123	272	4e-74	278	KH domain-containing protein At4g18375
Solyc05g053650.3.1	100	150	0	0	1	150	7452	7303	4e-74	278	26S proteasome non-ATPase regulatory subunit 1 homolog A
Solyc09g089580.3.1	100	150	0	0	1	150	1679	1828	4e-74	278	E8 protein
Solyc07g063410.3.1	100	150	0	0	1	150	1236	1087	4e-74	278	JA2-like
Solyc03g121070.3.1	100	150	0	0	1	150	2684	2535	4e-74	278	IAA26
Solyc12g057120.2.1	100	150	0	0	1	150	380	231	4e-74	278	14-3-3 protein 2
Solyc04g054990.3.1	100	150	0	0	1	150	1744	1595	4e-74	278	PLAT domain-containing protein 2-like
Solyc01g108560.3.1	100	150	0	0	1	150	16103	15954	4e-74	278	carboxylesterase 1
Solyc10g078300.2.1	100	150	0	0	1	150	2118	1969	4e-74	278	R3H domain-containing protein 2
Solyc08g080650.2.1	100	150	0	0	1	150	686	835	4e-74	278	protein NP24, partial
Solyc05g053650.3.1	100	150	0	0	1	150	7960	7811	4e-74	278	26S proteasome non-ATPase regulatory subunit 1 homolog A
Solyc04g081170.3.1	100	150	0	0	1	150	1130	981	4e-74	278	GAGA-binding transcriptional activator isoform X1
Solyc05g009290.3.1	100	150	0	0	1	150	266	117	4e-74	278	protein FLX-like 3
Solyc02g070935.1.1	100	150	0	0	1	150	2424	2275	4e-74	278	chlorophyll a-b binding protein 1B, chloroplastic
Solyc06g006080.3.1	100	150	0	0	1	150	4938	4789	4e-74	278	thiamine biosynthesis protein ThiC
Solyc02g070550.3.1	100	150	0	0	1	150	5062	4913	4e-74	278	la-related protein 6A
Solyc01g095180.2.1	100	150	0	0	1	150	989	840	4e-74	278	RING-H2 finger protein ATL67-like
Solyc02g070490.3.1	100	150	0	0	1	150	10804	10953	4e-74	278	pheophytinase, chloroplastic
Solyc04g074840.3.1	100	150	0	0	1	150	1057	908	4e-74	278	protein DETOXIFICATION 27-like
Solyc07g032640.2.1	100	150	0	0	1	150	166	315	4e-74	278	oxygen-evolving enhancer protein 1, chloroplastic
Solyc09g091510.3.1	100	150	0	0	1	150	2067	1918	4e-74	278	chalcone synthase 1
Solyc01g096580.3.1	100	150	0	0	1	150	4434	4285	4e-74	278	exonuclease family protein
Solyc01g111500.3.1	100	150	0	0	1	150	294	145	4e-74	278	myb-related protein 308-like
Solyc06g059740.3.1	100	150	0	0	1	150	2080	1931	4e-74	278	alcohol dehydrogenase 2
Solyc01g079090.3.1	100	150	0	0	1	150	5136	4987	4e-74	278	protoporphyrinogen oxidase
Solyc03g082420.3.1	100	150	0	0	1	150	280	131	4e-74	278	small heat shock protein, chloroplastic
Solyc02g066940.3.1	100	150	0	0	1	150	2058	1909	4e-74	278	protein RIK isoform X2
Solyc11g008470.2.1	100	150	0	0	1	150	10716	10567	4e-74	278	SART-1 family protein DOT2
Solyc09g065560.3.1	100	150	0	0	1	150	8068	8217	4e-74	278	protein NETWORKED 1D-like
Solyc10g006290.3.1	100	150	0	0	1	150	2700	2849	4e-74	278	constitutive plastid-lipid associated protein
Solyc10g006900.3.1	100	150	0	0	1	150	3726	3577	4e-74	278	light dependent NADH:protochlorophyllide oxidoreductase 3
Solyc08g074370.3.1	100	150	0	0	1	150	9402	9551	4e-74	278	DDB1- and CUL4-associated factor homolog 1
Solyc04g081170.3.1	100	150	0	0	1	150	689	540	4e-74	278	GAGA-binding transcriptional activator isoform X1
Solyc08g076930.1.1	100	150	0	0	1	150	1840	1989	4e-74	278	transcription factor MYC2
Solyc01g005060.3.1	100	150	0	0	1	150	173	322	4e-74	278	protein SHOOT GRAVITROPISM 5
Solyc01g005030.3.1	100	150	0	0	1	150	12788	12937	4e-74	278	E3 ubiquitin-protein ligase KEG isoform X1
Solyc02g069180.3.1	100	150	0	0	1	150	1450	1599	4e-74	278	BOI-related E3 ubiquitin-protein ligase 1
Solyc03g093140.3.1	100	150	0	0	1	150	57	206	4e-74	278	putative glycerol-3-phosphate transporter 1
Solyc06g061250.2.1	100	150	0	0	1	150	10125	10274	4e-74	278	RING-H2 finger protein ATL51-like
Solyc05g054830.3.1	100	150	0	0	1	150	4506	4357	4e-74	278	ankyrin repeat-containing protein ITN1
Solyc04g011580.3.1	100	150	0	0	1	150	7537	7686	4e-74	278	pumilio homolog 1-like
Solyc03g111690.3.1	100	150	0	0	1	150	1743	1594	4e-74	278	probable pectate lyase 18
Solyc11g011470.2.1	100	150	0	0	1	150	207	58	4e-74	278	NADH dehydrogenase [ubiquinone] iron-sulfur protein 1, mitochondrial
Solyc09g018280.1.1	100	150	0	0	1	150	1140	991	4e-74	278	CBL-interacting serine..threonine-protein kinase 14
Solyc07g025140.3.1	100	150	0	0	1	150	208	59	4e-74	278	myosin heavy chain kinase B-like
Solyc07g054740.3.1	100	150	0	0	1	150	338	189	4e-74	278	vesicle-associated protein 4-3 isoform X2
Solyc01g111275.1.1	100	150	0	0	1	150	3617	3468	4e-74	278	glycine-rich protein 2-like
Solyc01g095990.3.1	100	150	0	0	1	150	3488	3637	4e-74	278	phosphatidylinositol 4-kinase gamma 4-like
Solyc03g119530.3.1	100	150	0	0	1	150	941	1090	4e-74	278	LOB domain-containing protein 40-like
Solyc08g080490.3.1	100	150	0	0	1	150	1158	1009	4e-74	278	2S sulfur-rich seed storage protein 2-like
Solyc06g061250.2.1	100	150	0	0	1	150	10079	10228	4e-74	278	RING-H2 finger protein ATL51-like
Solyc07g049140.3.1	100	150	0	0	1	150	22	171	4e-74	278	fruit-specific protein
Solyc09g015770.3.1	100	150	0	0	1	150	331	480	4e-74	278	WRKY3
Solyc01g109655.1.1	100	150	0	0	1	150	1075	926	4e-74	278	transcription factor RADIALIS
Solyc01g112230.3.1	100	150	0	0	1	150	195	344	4e-74	278	metallothionein-like protein 4B isoform X2
Solyc03g119130.3.1	100	150	0	0	1	150	4477	4626	4e-74	278	basic salivary proline-rich protein 1
Solyc08g082410.3.1	100	150	0	0	1	150	2975	3124	4e-74	278	zinc finger CCCH domain-containing protein 13 isoform X1
Solyc01g105990.3.1	100	150	0	0	1	150	9632	9781	4e-74	278	protein EXECUTER 1, chloroplastic
Solyc03g083560.1.1	100	150	0	0	1	150	1022	873	4e-74	278	protein EXORDIUM-like 3
Solyc05g054830.3.1	100	150	0	0	1	150	4536	4387	4e-74	278	ankyrin repeat-containing protein ITN1
Solyc01g095210.3.1	100	150	0	0	1	150	2678	2529	4e-74	278	golgin candidate 4 isoform X2
Solyc01g095200.3.1	100	150	0	0	1	150	2761	2612	4e-74	278	reticulon-like protein B1
Solyc11g012700.2.1	100	150	0	0	1	150	4249	4100	4e-74	278	oligopeptide transporter 3
Solyc11g008000.2.1	100	150	0	0	1	150	5925	6074	4e-74	278	NAC domain-containing protein 53
Solyc01g090880.3.1	100	150	0	0	1	150	1296	1445	4e-74	278	transcription repressor OFP17-like
Solyc12g009680.2.1	100	150	0	0	1	150	419	568	4e-74	278	heptahelical transmembrane protein ADIPOR1-like
Solyc09g091610.3.1	100	150	0	0	1	150	1463	1314	4e-74	278	protein SULFUR DEFICIENCY-INDUCED 2
Solyc05g012710.3.1	100	150	0	0	1	150	4513	4364	4e-74	278	cell division topological specificity factor homolog, chloroplastic
Solyc03g034180.3.1	100	150	0	0	1	150	737	886	4e-74	278	14-3-3-like protein
Solyc02g090070.3.1	100	150	0	0	1	150	93	242	4e-74	278	BTB..POZ domain-containing protein At5g66560
Solyc11g068950.2.1	100	150	0	0	1	150	132	281	4e-74	278	BEL1-like homeodomain protein 1
Solyc10g084350.2.1	100	150	0	0	1	150	302	153	4e-74	278	60S ribosomal protein L4-1-like
Solyc01g095180.2.1	100	150	0	0	1	150	953	1102	4e-74	278	RING-H2 finger protein ATL67-like
Solyc05g053880.3.1	100	150	0	0	1	150	254	403	4e-74	278	protein CMSS1 isoform X1
Solyc04g007400.3.1	100	150	0	0	1	150	7883	8032	4e-74	278	LEAF RUST 10 DISEASE-RESISTANCE LOCUS RECEPTOR-LIKE PROTEIN KINASE-like 1.1
Solyc10g076790.2.1	100	150	0	0	1	150	253	402	4e-74	278	LAX4 protein
Solyc01g109870.3.1	100	150	0	0	1	150	240	389	4e-74	278	phosphatidylinositol..phosphatidylcholine transfer protein SFH8
Solyc01g109860.3.1	100	150	0	0	1	150	3994	4143	4e-74	278	phosphatidylinositol..phosphatidylcholine transfer protein SFH8
Solyc02g082250.3.1	100	150	0	0	1	150	4178	4327	4e-74	278	thioredoxin reductase NTRB-like
Solyc09g090160.3.1	100	150	0	0	1	150	7094	6945	4e-74	278	putative E3 ubiquitin-protein ligase XBAT35 isoform X2
Solyc09g018280.1.1	100	150	0	0	1	150	658	807	4e-74	278	CBL-interacting serine..threonine-protein kinase 14
Solyc08g067030.3.1	100	150	0	0	1	150	4724	4575	4e-74	278	uncharacterized protein LOC101262737
Solyc07g026960.3.1	100	150	0	0	1	150	39921	39772	4e-74	278	Integrase core domain containing protein [Solanum demissum]
Solyc02g094090.3.1	100	150	0	0	1	150	334	185	4e-74	278	vacuolar protein sorting-associated protein 52 A-like
Solyc11g044320.2.1	100	150	0	0	1	150	7623	7772	4e-74	278	telomere repeat-binding factor 1
Solyc08g080490.3.1	100	150	0	0	1	150	977	1126	4e-74	278	2S sulfur-rich seed storage protein 2-like
Solyc01g009170.3.1	100	150	0	0	1	150	874	1023	4e-74	278	EIL2
Solyc01g111933.1.1	100	150	0	0	1	150	854	1003	4e-74	278	rop guanine nucleotide exchange factor 1
Solyc01g111920.3.1	100	150	0	0	1	150	3833	3982	4e-74	278	F-box protein SKIP23-like
Solyc04g016380.3.1	100	150	0	0	1	150	308	159	4e-74	278	ribosome biogenesis protein BRX1
Solyc04g011440.3.1	100	150	0	0	1	150	3002	2853	4e-74	278	heat shock protein 70 isoform 3
Solyc02g070935.1.1	100	150	0	0	1	150	2546	2695	4e-74	278	chlorophyll a-b binding protein 1B, chloroplastic
Solyc04g081170.3.1	100	150	0	0	1	150	1021	1170	4e-74	278	GAGA-binding transcriptional activator isoform X1
Solyc09g076050.3.1	100	150	0	0	1	150	3263	3114	4e-74	278	FRIGIDA-like protein 4a
Solyc08g074620.2.1	100	150	0	0	1	150	11744	11595	4e-74	278	polyphenol oxidase F, chloroplastic
Solyc01g112230.3.1	100	150	0	0	1	150	174	323	4e-74	278	metallothionein-like protein 4B isoform X2
Solyc01g095330.2.1	100	150	0	0	1	150	1146	997	4e-74	278	BAG family molecular chaperone regulator 6
Solyc08g079730.1.1	100	150	0	0	1	150	1295	1146	4e-74	278	protein DETOXIFICATION 56-like
Solyc01g109080.3.1	100	150	0	0	1	150	21915	22064	4e-74	278	serine..threonine-protein kinase SMG1-like
Solyc09g090160.3.1	100	150	0	0	1	150	8192	8043	4e-74	278	putative E3 ubiquitin-protein ligase XBAT35 isoform X2
Solyc09g015000.3.1	100	150	0	0	1	150	256	405	4e-74	278	18.2 kDa class I heat shock protein-like
Solyc10g075150.2.1	100	150	0	0	1	150	1409	1260	4e-74	278	non-specific lipid-transfer protein 2-like
Solyc06g076510.3.1	100	150	0	0	1	150	3558	3707	4e-74	278	17.7 kD class I small heat shock protein
Solyc06g059740.3.1	100	150	0	0	1	150	2044	1895	4e-74	278	alcohol dehydrogenase 2
Solyc08g066570.2.1	100	150	0	0	1	150	3290	3141	4e-74	278	regulator of chromosome condensation ..RCC1.. family protein
Solyc09g005760.3.1	100	150	0	0	1	150	318	169	4e-74	278	U3 small nucleolar RNA-associated protein 14 homolog A
Solyc06g070970.3.1	100	150	0	0	1	150	4163	4014	4e-74	278	WRKY72b
Solyc10g078300.2.1	100	150	0	0	1	150	1877	2026	4e-74	278	R3H domain-containing protein 2
Solyc08g077700.3.1	100	150	0	0	1	150	17082	17231	4e-74	278	eukaryotic translation initiation factor 4G-like isoform X1
Solyc05g005540.3.1	100	150	0	0	1	150	179	328	4e-74	278	AROGP3
Solyc02g069180.3.1	100	150	0	0	1	150	1626	1477	4e-74	278	BOI-related E3 ubiquitin-protein ligase 1
Solyc07g053830.3.1	100	150	0	0	1	150	4280	4131	4e-74	278	ADP,ATP carrier protein 1, mitochondrial
Solyc05g007770.3.1	100	150	0	0	1	150	2055	1906	4e-74	278	NAC transcription factor family protein
Solyc04g076220.3.1	100	150	0	0	1	150	1459	1310	4e-74	278	AT-hook motif nuclear-localized protein 17
Solyc03g113270.3.1	100	150	0	0	1	150	2079	1930	4e-74	278	homeobox-leucine zipper protein HAT5-like
Solyc06g066320.3.1	100	150	0	0	1	150	745	596	4e-74	278	protein IWS1 homolog 2
Solyc03g044300.3.1	100	150	0	0	1	150	303	452	4e-74	278	APETALA2-like protein
Solyc03g096920.3.1	100	150	0	0	1	150	480	331	4e-74	278	exportin 1
Solyc05g007200.3.1	100	150	0	0	1	150	350	499	4e-74	278	binding partner of ACD11 1
Solyc01g008270.3.1	100	150	0	0	1	150	3742	3891	4e-74	278	probable prefoldin subunit 5
Solyc09g098220.3.1	100	150	0	0	1	150	4440	4589	4e-74	278	protein ROOT PRIMORDIUM DEFECTIVE 1
Solyc06g065100.3.1	100	150	0	0	1	150	1939	1790	4e-74	278	myb-related protein 330
Solyc10g005060.3.1	100	150	0	0	1	150	289	438	4e-74	278	catechol-O-methyltransferase
Solyc01g106260.3.1	100	150	0	0	1	150	4039	3890	4e-74	278	heat shock 70 kDa protein, mitochondrial-like
Solyc03g121840.3.1	100	150	0	0	1	150	605	754	4e-74	278	single myb histone 4
Solyc01g111130.3.1	100	150	0	0	1	150	1966	1817	4e-74	278	transcription factor bHLH121 isoform X1
Solyc10g079070.2.1	100	150	0	0	1	150	5450	5301	4e-74	278	transcription factor bHLH48
Solyc05g006650.3.1	100	150	0	0	1	150	240	91	4e-74	278	transcription factor bHLH79
Solyc07g043580.3.1	100	150	0	0	1	150	2999	2850	4e-74	278	PIF4,bHLH transcription factor 052
Solyc01g096070.3.1	100	148	0	0	1	148	3615	3468	5e-73	274	auxin response factor 18
Solyc03g113620.3.1	100	148	0	0	3	150	736	883	5e-73	274	transcription factor MYB1R1
Solyc01g091650.3.1	99.33	150	1	0	1	150	692	543	2e-72	272	COP9 signalosome complex subunit 1
Solyc01g111440.3.1	99.33	150	1	0	1	150	2707	2558	2e-72	272	protein EARLY-RESPONSIVE TO DEHYDRATION 7, chloroplastic-like
Solyc03g118680.3.1	99.33	150	1	0	1	150	1177	1028	2e-72	272	zinc finger protein VAR3, chloroplastic
Solyc03g118670.3.1	99.33	150	1	0	1	150	6691	6542	2e-72	272	ERAD-associated E3 ubiquitin-protein ligase component HRD3A
Solyc02g069850.3.1	100	147	0	0	4	150	2005	2151	2e-72	272	nuclear transcription factor Y subunit A-7 isoform X1
Solyc10g005650.3.1	99.33	150	1	0	1	150	307	456	2e-72	272	peroxisome biogenesis protein 5
Solyc10g005640.3.1	99.33	150	1	0	1	150	12105	12254	2e-72	272	probable protein phosphatase 2C 6
Solyc04g074790.2.1	99.33	150	1	0	1	150	1874	1725	2e-72	272	RING-H2 finger protein ATL54-like
Solyc02g093630.3.1	99.33	150	1	0	1	150	4998	5147	2e-72	272	very-long-chain 3-oxoacyl-CoA reductase 1
Solyc03g119660.2.1	99.33	150	1	0	1	150	315	464	2e-72	272	pollen-specific leucine-rich repeat extensin-like protein 2
Solyc03g119650.3.1	99.33	150	1	0	1	150	19309	19458	2e-72	272	DENN domain and WD repeat-containing protein SCD1 isoform X1
Solyc08g082610.3.1	99.34	151	0	1	1	150	550	400	2e-72	272	B2 protein
Solyc09g097870.3.1	99.33	150	1	0	1	150	1093	944	2e-72	272	transcription factor bHLH62
Solyc01g009070.3.1	99.33	150	1	0	1	150	554	405	2e-72	272	GAMyb-like1
Solyc01g111920.3.1	99.33	150	1	0	1	150	3507	3358	2e-72	272	F-box protein SKIP23-like
Solyc02g005210.3.1	98.67	150	2	0	1	150	184	333	8e-71	267	protein COFACTOR ASSEMBLY OF COMPLEX C SUBUNIT B CCB1, chloroplastic
Solyc12g009390.2.1	98.67	150	2	0	1	150	707	856	8e-71	267	zinc finger CCCH domain-containing protein 16
Solyc11g066120.2.1	95.74	141	2	3	1	138	2215	2076	5e-58	224	inner membrane protein PPF-1, chloroplastic isoform X1
Solyc02g092920.3.1	95.74	141	2	1	1	141	8918	9054	5e-58	224	transcription factor MYB44-like
Solyc09g010820.3.1	98.4	125	2	0	1	125	8050	7926	6e-57	220	myb-related protein B
Solyc06g065100.3.1	100	118	0	0	1	118	1990	2107	2e-56	219	myb-related protein 330
Solyc01g095030.3.1	100	114	0	0	1	114	297	184	4e-54	211	R1-MYB type transcription factor ARS1
Solyc01g108300.3.1	100	114	0	0	1	114	2207	2094	4e-54	211	myb family transcription factor isoform X1
Solyc01g111500.3.1	96.12	129	3	2	1	128	558	685	1e-53	209	myb-related protein 308-like
Solyc02g084880.3.1	99.05	105	0	1	46	150	5333	5436	6e-47	187	transcription factor bHLH110-like
Solyc08g014120.3.1	95.61	114	5	0	1	114	4076	4189	8e-46	183	transcription factor bHLH113 isoform X1
Solyc08g014120.3.1	98.02	101	1	1	1	101	51	150	5e-43	174	transcription factor bHLH113 isoform X1
Solyc07g063830.3.1	97.14	105	0	2	49	150	3804	3908	5e-43	174	transcription factor bHLH123
Solyc11g056650.2.1	98.97	97	1	0	1	97	679	775	5e-43	174	transcription factor bHLH81
Solyc02g093740.3.1	96.19	105	4	0	1	105	1768	1872	2e-42	172	myb-related protein 315
Solyc01g079620.3.1	100	76	0	0	1	76	2890	2815	5e-33	141	MYB12
Solyc01g086870.3.1	100	76	0	0	1	76	55	130	5e-33	141	transcription factor bHLH130-like
Solyc06g071230.3.1	98.72	78	1	0	1	78	1653	1730	2e-32	139	transcription factor MYB1R1
Solyc01g010135.1.1	100	73	0	0	1	73	4277	4205	2e-31	135	transcription factor bHLH49-like
Solyc03g005570.3.1	98.67	75	1	0	11	85	2360	2286	8e-31	134	myb-related protein Myb4
Solyc11g072310.2.1	98.44	64	1	0	87	150	1682	1619	1e-24	113	gibberellin 20-oxidase-3
Solyc04g076030.2.1	96.88	64	2	0	1	64	694	631	5e-23	108	transcription factor bHLH143-like
Solyc07g008015.1.1	89.53	86	5	4	25	107	1970	1886	2e-22	106	transcription factor MYB82
Solyc08g075100.3.1	100	55	0	0	1	55	5812	5866	2e-21	102	transcription factor bHLH53-like
